# Supplementary material
Source: MDPI journal article supplement (https://www.mdpi.com/2073-4433/6/11/1833)
Supplement: s1 [file s1]

**OPEN ACCESS**

***atmosphere***

**ISSN 2073-4433**

www.mdpi.com/journal/atmosphere

Supplementary Information

An Assessment of the South Asian Summer Monsoon Variability for Present and Future Climatologies Using a High Resolution Regional Climate Model (RegCM4.3) under the AR5 Scenarios. *Atmosphere* 2015, *6*, 1833-1857

Mujtaba Hassan 1,2,*, Pengfei Du 1,*, Shaofeng Jia 3, Waheed Iqbal 4, Rashid Mahmood 3
and Wulong Ba 1

1 State Key Laboratory of Environmental Simulation and Pollution Control (SKLESPC), School of Environment, Tsinghua University, Beijing 100084, China; E-Mail: bawulong@sina.com

2 Department of Space Sciences, Institute of Space Technology, Islamabad Highway,
Islamabad 44000, Pakistan

3 Institute of Geographic Science and Natural Resources Research/Key Laboratory of Water Cycle and Related Land Surface Processes, Chinese Academy of Sciences, Beijing 100101, China;
E-Mails: jiasf@igsnrr.ac.cn (S.J.); rashi1254@gmail.com (R.M.)

4 Meteorology Institute of Stockholm University (MISU), Stockholm SE-106 91, Sweden;
E-Mail: waheed.iqbal@misu.su.se

***** Authors to whom correspondence should be addressed; E-Mails: mhassan512@yahoo.com (M.H.); dupf@tsinghua.edu.cn (P.D.); Tel.: +86-10-6278-4521 (P.D.); Fax: +86-10-6278-5687 (P.D.).


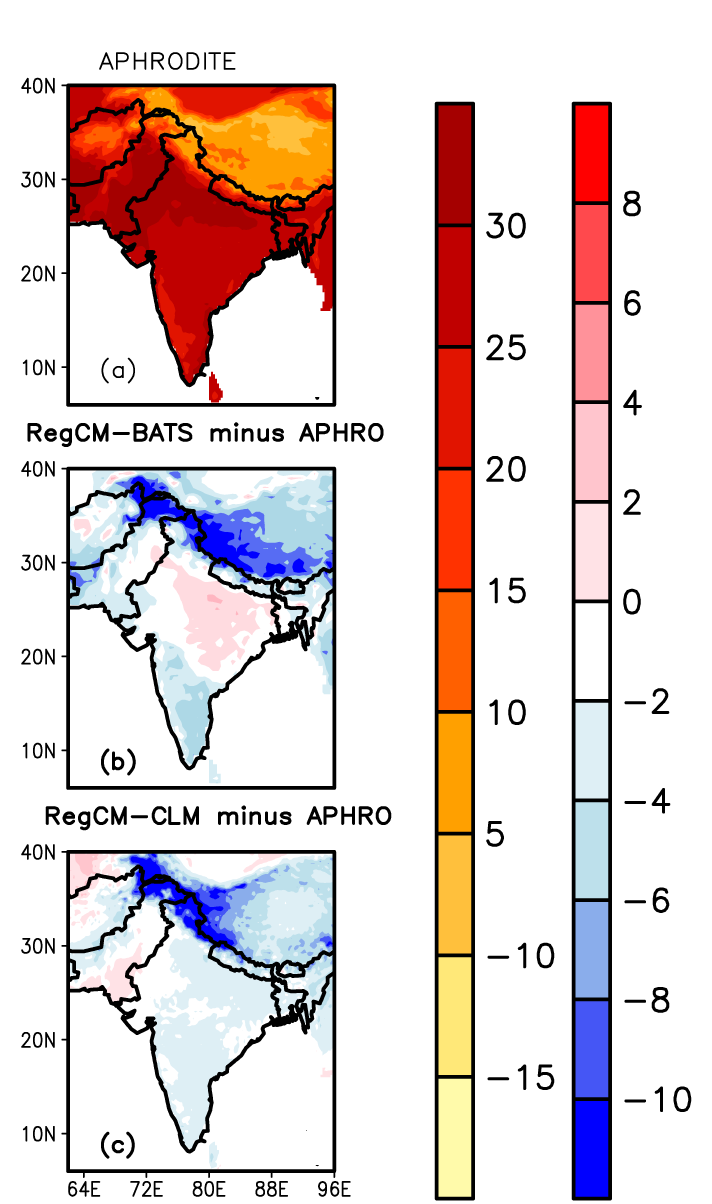


**Figure S1.** Spatial distribution of SASM mean surface air temperature (oC) for **(a)** APHRODITE, and biases with respect to APHRODITE for **(b)** RegCM4 coupled with Biosphere Atmosphere Transfer Scheme (BATS), **(c)** RegCM4 coupled with Community Land Model v3.5 (CLM3.5).

© 2015 by the authors; licensee MDPI, Basel, Switzerland. This article is an open access article distributed under the terms and conditions of the Creative Commons Attribution license (http://creativecommons.org/licenses/by/4.0/).
